# Supplementary material
Source: MDPI journal article supplement (https://www.mdpi.com/2077-1312/10/6/714)
Supplement: s1 [file s1]

## Supplemental results

### Experimental conditions

The abiotic data are shown in Figure S4 and Table S1. Briefly, the CO<sub>2</sub> concentration differed significantly between treatments ( $p < 0.000001$ ), and the AquaControllers led to precise regulation of the CO<sub>2</sub> in each of the six mesocosms. Irradiance (~50cm below the surface) was ~7,000-7,500 Lux (approximately ~100  $\mu\text{mol photons m}^{-2} \text{ s}^{-1}$  according to the equations of Thimijan & Heins [1]). The natural photosynthetically active radiation (PAR) coming from outside the mesocosms was only  $22.1 \pm 12.9 \mu\text{mol photons m}^{-2} \text{ s}^{-1}$  (SE for this & all future error terms unless noted otherwise) at 10:00,  $5.3 \pm 1.2 \mu\text{mol photons m}^{-2} \text{ s}^{-1}$  at 12:00,  $3.7 \pm 1.1 \mu\text{mol photons m}^{-2} \text{ s}^{-1}$  at 15:00, and  $0.2 \pm 0.1 \mu\text{mol photons m}^{-2} \text{ s}^{-1}$  at 18:00 at the seawater surface since shade cloth was draped over the tanks; as such, the vast majority of the irradiance experienced by the seagrass blades was from the artificial lights (discussed in the main text).

Although temperature control was generally precise throughout the 12-week experiment, one chiller broke down in one of the three control CO<sub>2</sub> mesocosms during the third week, leading to a brief temperature spike evident in Figure S4A. Throughout the study, the pH was maintained between 8.20 and 8.23 in the control mesocosms and 7.70 and 7.73 in the high-CO<sub>2</sub> ones (Figure S4B). However, no pH adjustments for the AquaController were made between the 1<sup>st</sup> and 4<sup>th</sup> weeks and between the 13<sup>th</sup> and 14<sup>th</sup> weeks; this caused the pH values (as measured by the YSI instrument) to 1) increase gradually from the 1<sup>st</sup> to the 4<sup>th</sup> week and 2) decrease after the 13<sup>th</sup> week. Such pH variation also influenced TA, the CO<sub>2</sub> concentration, [HCO<sub>3</sub><sup>-</sup>], and the aragonite saturation state during these periods.

Salinity ranged from 34.7 to 35 (Figure S4C) and did not vary significantly between CO<sub>2</sub> treatments (Table S2). The concentration of DO varied from 6 to 10 mg L<sup>-1</sup> in all mesocosms (Figure S4D), and DO decreased with increasing temperatures. There were no differences in

temperature and DO between control and high-CO<sub>2</sub> mesocosms (Table S2). The TA (Figure S4E), CO<sub>2</sub> (Figure S4F), and [HCO<sub>3</sub><sup>-</sup>] (Figure S4G) were significantly higher in the high-CO<sub>2</sub> mesocosms (Table S2), and TA and [HCO<sub>3</sub><sup>-</sup>] decreased in both high-CO<sub>2</sub> and control mesocosms as temperatures rose (Table S2). The CO<sub>2</sub> concentration (Figure S4F) was affected by both temperature and time nested within the experimental stage ( $p=0.005$ ). ΩAr (Figure S4H) was higher in the control CO<sub>2</sub> mesocosms, as expected (Table S2). The nutrient concentrations (Figure S4I-K) did not differ significantly between the control and high-CO<sub>2</sub> mesocosms (Table S2); however, [PO<sub>4</sub><sup>3-</sup>] (Figure 4L) decreased when the temperature was increased from 25 to 28°C, yet increased when the temperature was increased from 28 to 31°C. Nitrate (Figure S1I) and nitrite (Figure S1J) concentrations showed the contrasting trend, increasing from 25 to 28°C and then decreasing from 28 to 31°C.

### Supplemental reference

1. Thimijan, R.W.; Heins, R.D. Photometric, radiometric, and quantum light units of measure: a review of procedures for interconversion. *Hort Science*. **1983**, 18(6), 818-822.

**Table S1.** The mean values ( $\pm$ SE, n=3) of the abiotic parameters in the ambient (i.e., control) and high-CO<sub>2</sub> mesocosms under three different temperature treatments. AC=AquaController.

|                                                                        | 25°C                 |                         | 28°C                 |                         | 31°C                 |                         |
|------------------------------------------------------------------------|----------------------|-------------------------|----------------------|-------------------------|----------------------|-------------------------|
|                                                                        | high CO <sub>2</sub> | ambient CO <sub>2</sub> | high CO <sub>2</sub> | ambient CO <sub>2</sub> | high CO <sub>2</sub> | ambient CO <sub>2</sub> |
| <b>AC-pH</b>                                                           | 7.73 $\pm$ 0.00      | 8.20 $\pm$ 0.00         | 7.70 $\pm$ 0.00      | 8.22 $\pm$ 0.00         | 7.70 $\pm$ 0.00      | 8.23 $\pm$ 0.00         |
| <b>AC-Temperature (°C)</b>                                             | 25.1 $\pm$ 0.0       | 25.1 $\pm$ 0.0          | 28.0 $\pm$ 0.0       | 28.0 $\pm$ 0.0          | 30.8 $\pm$ 0.0       | 30.8 $\pm$ 0.0          |
| <b>HOBO-Temperature (°C)</b>                                           | 25.4 $\pm$ 0.0       | 25.6 $\pm$ 0.0          | 28.3 $\pm$ 0.0       | 28.4 $\pm$ 0.0          | 31.0 $\pm$ 0.0       | 31.1 $\pm$ 0.0          |
| <b>PAR (<math>\mu</math>mol photons m<sup>-2</sup> s<sup>-1</sup>)</b> | 103.5 $\pm$ 1.5      | 99.0 $\pm$ 1.8          | 101.2 $\pm$ 1.4      | 99.1 $\pm$ 1.1          | 96.3 $\pm$ 2.0       | 100.9 $\pm$ 1.9         |
| <b>YSI-pH</b>                                                          | 7.92 $\pm$ 0.01      | 8.18 $\pm$ 0.01         | 7.61 $\pm$ 0.01      | 7.94 $\pm$ 0.01         | 7.58 $\pm$ 0.01      | 7.92 $\pm$ 0.02         |
| <b>YSI-Temperature (°C)</b>                                            | 25.1 $\pm$ 0.0       | 25.2 $\pm$ 0.0          | 28.1 $\pm$ 0.0       | 28.2 $\pm$ 0.02         | 30.9 $\pm$ 0.0       | 31.0 $\pm$ 0.0          |
| <b>YSI-DO (mg L<sup>-1</sup>)</b>                                      | 6.19 $\pm$ 0.15      | 6.22 $\pm$ 0.15         | 5.92 $\pm$ 0.16      | 5.91 $\pm$ 0.17         | 5.47 $\pm$ 0.14      | 5.46 $\pm$ 0.15         |
| <b>YSI-Salinity</b>                                                    | 34.8 $\pm$ 0.0       | 34.8 $\pm$ 0.0          | 34.7 $\pm$ 0.0       | 34.8 $\pm$ 0.05         | 34.7 $\pm$ 0.0       | 34.7 $\pm$ 0.0          |
| <b>TA (<math>\mu</math>mol kg<sup>-1</sup> SW)</b>                     | 2,309 $\pm$ 235      | 2,250 $\pm$ 219         | 2,300 $\pm$ 12       | 2,204 $\pm$ 6           | 2,143 $\pm$ 59       | 1,898 $\pm$ 126         |
| <b>[ CO<sub>2</sub> ] (ppm)</b>                                        | 1,372 $\pm$ 159      | 444 $\pm$ 50            | 1,210 $\pm$ 88       | 381 $\pm$ 28            | 1,220 $\pm$ 136      | 286 $\pm$ 51            |
| <b>[HCO<sub>3</sub><sup>-</sup>] (mmol kg<sup>-1</sup> SW)</b>         | 2,081 $\pm$ 208      | 1,761 $\pm$ 170         | 2,040 $\pm$ 25       | 1,667 $\pm$ 25          | 1,883 $\pm$ 64       | 1,352 $\pm$ 122         |
| <b><math>\Omega_{Ar}</math></b>                                        | 1.49 $\pm$ 0.26      | 3.18 $\pm$ 0.49         | 1.71 $\pm$ 0.09      | 3.50 $\pm$ 0.19         | 1.72 $\pm$ 0.03      | 3.49 $\pm$ 0.10         |
| <b>[PO<sub>4</sub><sup>3-</sup>] (mg L<sup>-1</sup>)</b>               | 0.02 $\pm$ 0.01      | 0.02 $\pm$ 0.01         | 0.01 $\pm$ 0.00      | 0.01 $\pm$ 0.00         | 0.05 $\pm$ 0.01      | 0.06 $\pm$ 0.00         |
| <b>[NH<sub>4</sub><sup>+</sup>] (mg L<sup>-1</sup>)</b>                | 0.04 $\pm$ 0.01      | 0.04 $\pm$ 0.01         | 0.03 $\pm$ 0.01      | 0.03 $\pm$ 0.01         | 0.04 $\pm$ 0.01      | 0.04 $\pm$ 0.01         |
| <b>[NO<sub>2</sub><sup>-</sup>] (mg L<sup>-1</sup>)</b>                | 0.001 $\pm$ 0.001    | 0.001 $\pm$ 0.001       | 0.004 $\pm$ 0.002    | 0.007 $\pm$ 0.006       | 0.004 $\pm$ 0.001    | 0.003 $\pm$ 0.001       |
| <b>[NO<sub>3</sub><sup>-</sup>] (mg L<sup>-1</sup>)</b>                | 0.004 $\pm$ 0.002    | 0.007 $\pm$ 0.001       | 0.004 $\pm$ 0.004    | 0.004 $\pm$ 0.003       | 0.019 $\pm$ 0.006    | 0.011 $\pm$ 0.004       |

**Table S2.** Nested, repeated measures ANOVA *F*-values for water quality parameters throughout the three-month study. Please note that a “Tank(CO<sub>2</sub>)” term was a random effect in the mixed model. DO=dissolved oxygen. TA=total alkalinity. temp.=temperature. \**p*<0.05, \*\**p*<0.01, \*\*\**p*<0.001.

| Parameter                                                           | CO <sub>2</sub> | Temp.                        | CO <sub>2</sub> × temp. | CO <sub>2</sub> (Temp.) | Week(Temp.)     | Week                         |
|---------------------------------------------------------------------|-----------------|------------------------------|-------------------------|-------------------------|-----------------|------------------------------|
| df                                                                  | 1               | 2                            | 2                       |                         |                 |                              |
| YSI-pH                                                              | <b>624***</b>   | <b>8.83***</b>               | 0.8025                  | <b>281***</b>           | <b>6.84***</b>  | 7.18                         |
| YSI-Temp. (°C)                                                      | 2.54            | <b>&gt;10<sup>5</sup>***</b> | 2.27                    | <b>39.2*</b>            | 0.753           | <b>8 x 10<sup>4</sup>***</b> |
| YSI-DO (mg L <sup>-1</sup> ) <sup>a</sup>                           | 0.0029          | <b>50.29***</b>              | 0.0051                  | 0.0073                  | <b>14.3***</b>  | <b>54.5***</b>               |
| YSI-Salinity <sup>b</sup>                                           | 0.235           | <b>11.5***</b>               | 0.239                   | <b>3.27*</b>            | <b>13.0***</b>  | <b>88.0***</b>               |
| TA (μmol kg <sup>-1</sup> SW) <sup>b</sup>                          | <b>37.1***</b>  | <b>70.25***</b>              | <b>3.59*</b>            | <b>3.87*</b>            | <b>38.3***</b>  | <b>23.8***</b>               |
| [CO <sub>2</sub> ] (ppm) <sup>c</sup>                               | <b>267***</b>   | <b>20.36***</b>              | <b>4.21*</b>            | <b>303.4***</b>         | <b>10.74***</b> | 0.797                        |
| [HCO <sub>3</sub> ] (mmol kg <sup>-1</sup> SW) <sup>b</sup>         | <b>317***</b>   | <b>79.2***</b>               | 1.71                    | <b>145***</b>           | <b>38.8***</b>  | <b>41.7***</b>               |
| Ω <sub>Ar</sub> <sup>a</sup>                                        | <b>258***</b>   | <b>13.4***</b>               | 0.0423                  | <b>64.1***</b>          | <b>7.048***</b> | <b>2.017*</b>                |
| [PO <sub>4</sub> <sup>3-</sup> ] (mg L <sup>-1</sup> ) <sup>b</sup> | 0.0024          | <b>58.3***</b>               | 1.30                    | 0.328                   | <b>4.16**</b>   | <b>11.9***</b>               |
| [NH <sub>4</sub> <sup>+</sup> ] (mg L <sup>-1</sup> ) <sup>b</sup>  | 1.30            | <b>3.89*</b>                 | 0.4084                  | 0.156                   | <b>19.6***</b>  | <b>16.2***</b>               |
| [NO <sub>2</sub> <sup>-</sup> ] (mg L) <sup>b</sup>                 | 0.775           | <b>16.9***</b>               | 0.0054                  | 0.0721                  | <b>8.99***</b>  | <b>8.68***</b>               |
| [NO <sub>3</sub> <sup>-</sup> ] (mg L <sup>-1</sup> ) <sup>b</sup>  | 1.56            | <b>33.0***</b>               | 3.00                    | 0.580                   | <b>14.3***</b>  | <b>16.3***</b>               |

<sup>a</sup>rank-transformed data. <sup>b</sup>box-cox-transformed data. <sup>c</sup>log-transformed data.

**Table S3.** The mean values of the physiological response variables of the high and ambient (i.e., control) CO<sub>2</sub> mesocosms at different temperatures (mean±SE, n=3).

|                                                               | 25°C                 |                         | 28°C                 |                         | 31°C                 |                         |
|---------------------------------------------------------------|----------------------|-------------------------|----------------------|-------------------------|----------------------|-------------------------|
|                                                               | high CO <sub>2</sub> | ambient CO <sub>2</sub> | high CO <sub>2</sub> | ambient CO <sub>2</sub> | high CO <sub>2</sub> | ambient CO <sub>2</sub> |
| <i>Fv:Fm</i>                                                  | 0.79±0.00            | 0.79±0.00               | 0.80±0.00            | 0.80±0.00               | 0.80±0.00            | 0.81±0.00               |
| Productivity (mg DW shoot <sup>-1</sup> d <sup>-1</sup> )     | 0.90±0.05            | 0.76±0.10               | 1.32±0.10            | 1.14±0.03               | 1.78±0.14            | 1.63±0.37               |
| Relative growth rate (mg DW g <sup>-1</sup> d <sup>-1</sup> ) | 4.38±0.35            | 4.90±0.89               | 6.58±0.37            | 7.02±0.48               | 9.40±0.67            | 9.41±0.26               |
| Leaf growth rate (mm shoot <sup>-1</sup> d <sup>-1</sup> )    | 3.61±0.55            | 3.59±0.44               | 6.93±0.24            | 6.85±0.39               | 8.34±0.33            | 8.19±0.95               |
| Shoot density (no. 10 cm <sup>-2</sup> )                      | 18.2±1.0             | 19.2±2.0                | 19.2±1.4             | 20.1±2.1                | 19.2±1.2             | 19.4±1.6                |
| Rate of shoot density increase (% week <sup>-1</sup> )        | 4.19±1.43            | 2.28±0.46               | 0.14±0.58            | -0.20±0.37              | -0.07±0.23           | -1.25±0.79              |
| Aboveground biomass (mg DW shoot <sup>-1</sup> )              | 59.4±6.9             | 57.1±9.1                | 64.6±2.7             | 51.5±4.9                | 65.4±13.3            | 59.8±16.2               |
| Underground biomass (mg DW shoot <sup>-1</sup> )              | 154.9±6.2            | 105.3±10.6              | 137.6±5.9            | 113.7±2.9               | 128.0±13.9           | 113.5±23.3              |
| Underground/ aboveground (U/A) ratio                          | 3.26±0.59            | 1.92±0.32               | 2.16±0.06            | 2.36±0.29               | 2.07±0.27            | 1.97±0.18               |
| Aboveground decomposition rate (% d <sup>-1</sup> )           | 1.65±0.06            | 1.42±0.20               | 2.12±0.20            | 2.46±0.12               | 2.47±0.27            | 2.58±0.26               |
| Underground decomposition rate (% d <sup>-1</sup> )           | 0.46±0.06            | 0.28±0.11               | 0.92±0.15            | 1.16±0.33               | 0.88±0.21            | 1.63±0.31               |
| Root carbon content (%)                                       | 34.1±0.5             | 33.7±0.1                | 29.2±1.2             | 31.5±0.3                | 32.4±0.2             | 31.9±0.7                |
| Root nitrogen content (%)                                     | 1.4±0.1              | 1.5±0.0                 | 1.2±0.1              | 1.4±0.1                 | 1.3±0.0              | 1.4±0.1                 |
| Root C:N ratio                                                | 24.6±1.3             | 21.8±0.2                | 26.0±1.6             | 22.7±1.3                | 24.1±0.3             | 22.3±1.3                |
| Rhizome carbon content (%)                                    | 34.0±0.8             | 33.9±1.8                | 32.7±0.3             | 32.1±0.2                | 34.5±1.1             | 35.4±5.2                |
| Rhizome nitrogen content (%)                                  | 1.5±0.0              | 1.4±0.1                 | 1.4±0.0              | 1.5±0.1                 | 1.4±0.1              | 1.4±0.1                 |

|                                                                      | 25°C                 |                         | 28°C                 |                         | 31°C                 |                         |
|----------------------------------------------------------------------|----------------------|-------------------------|----------------------|-------------------------|----------------------|-------------------------|
|                                                                      | high CO <sub>2</sub> | ambient CO <sub>2</sub> | high CO <sub>2</sub> | ambient CO <sub>2</sub> | high CO <sub>2</sub> | ambient CO <sub>2</sub> |
| <b>Rhizome C:N ratio</b>                                             | 22.9±0.4             | 25.8±1.2                | 23.2±0.3             | 21.6±1.3                | 24.9±1.2             | 25.0±2.3                |
| <b>Leaf carbon content (%)</b>                                       | 34.6±0.4             | 33.5±0.4                | 31.7±0.5             | 32.5±0.1                | 33.3±0.2             | 32.2±0.7                |
| <b>Leaf nitrogen content (%)</b>                                     | 2.2±0.2              | 2.1±0.1                 | 2.0±0.1              | 2.1±0.1                 | 1.9±0.1              | 1.9±0.1                 |
| <b>Leaf C:N ratio</b>                                                | 16.3±1.1             | 16.4±1.1                | 15.9±0.6             | 15.6±0.5                | 17.9±1.4             | 16.7±0.7                |
| <b>Carbon sequestration (mg C shoot<sup>-1</sup> d<sup>-1</sup>)</b> | 0.31±0.02            | 0.25±0.03               | 0.43±0.02            | 0.37±0.01               | 0.59±0.05            | 0.53±0.12               |
| <b>Shoot carbon content (g C shoot<sup>-1</sup>)</b>                 | 7.30±0.41            | 5.35±0.47               | 6.51±0.26            | 5.30±0.12               | 6.55±0.91            | 5.65±1.26               |

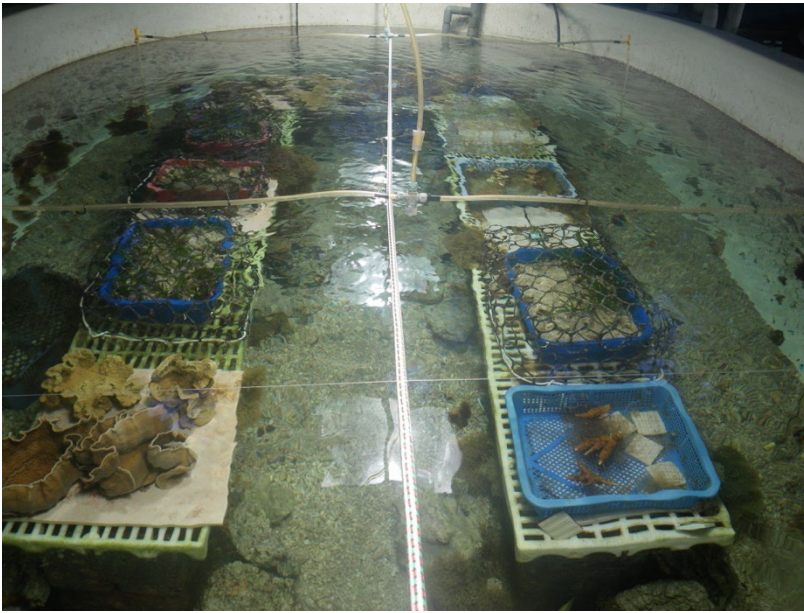

**Figure S1.** *A representative coral reef and seagrass mesocosm.* For scale, the length (longest dimension) of the bottom-right blue plastic basket is ~27.5 cm.

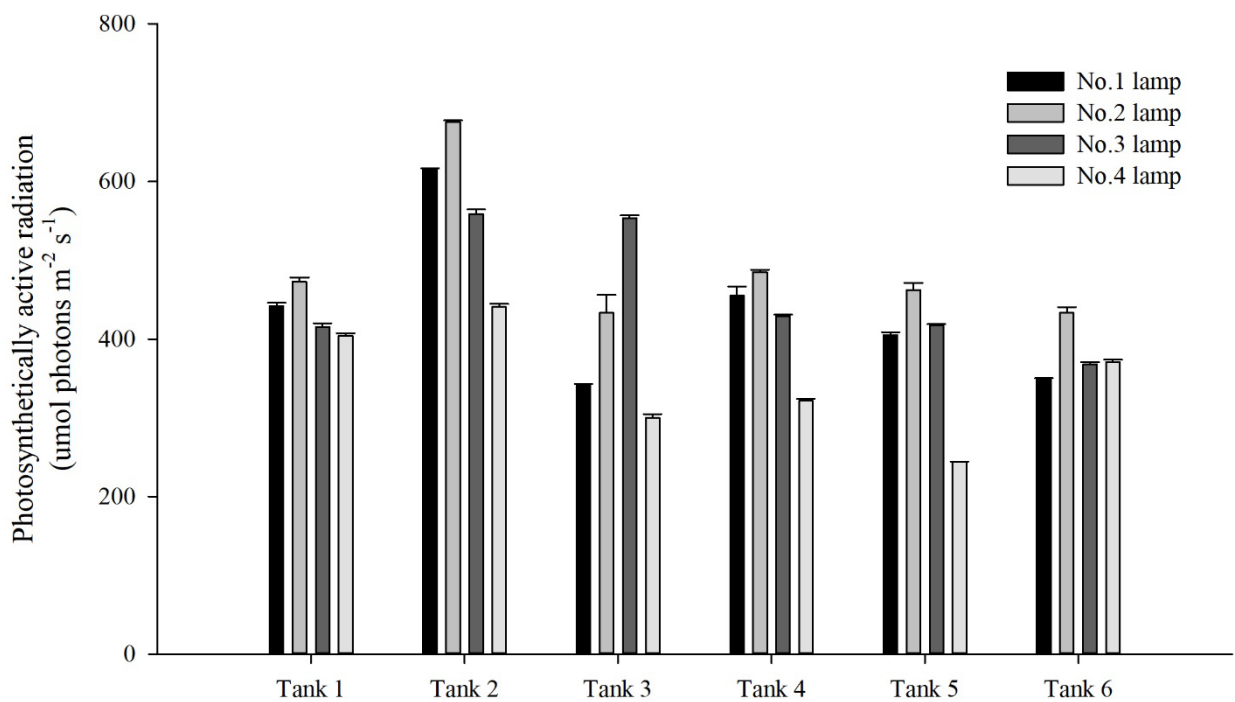

**Figure S2.** *The photosynthetically active radiation (PAR) at the seawater surface under each lamp of each tank.* Error bars represent standard deviation (SD).

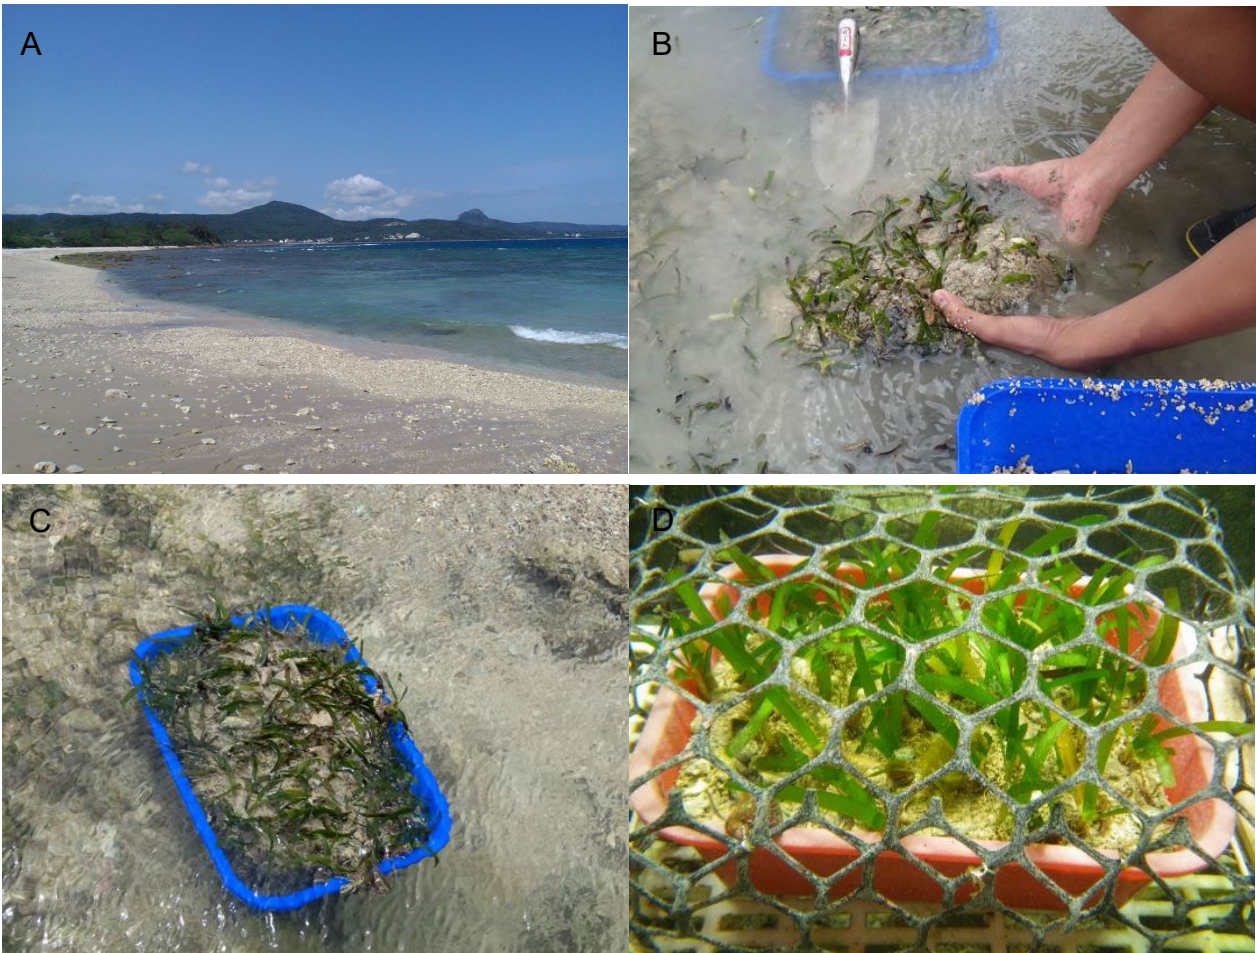

**Figure S3. *The seagrass bed study site.*** (A) Dakwan, Nanwan Bay, Southern Taiwan (22°03'N, 120°42'E). (B) Removal of seagrass (including roots & the associated sediment matrix) from the seagrass bed with a shovel at low tide. (C) Plastic bins later transported to the experimental mesocosms. (D) A bin enclosed in a 4 x 4 cm mesh cage.



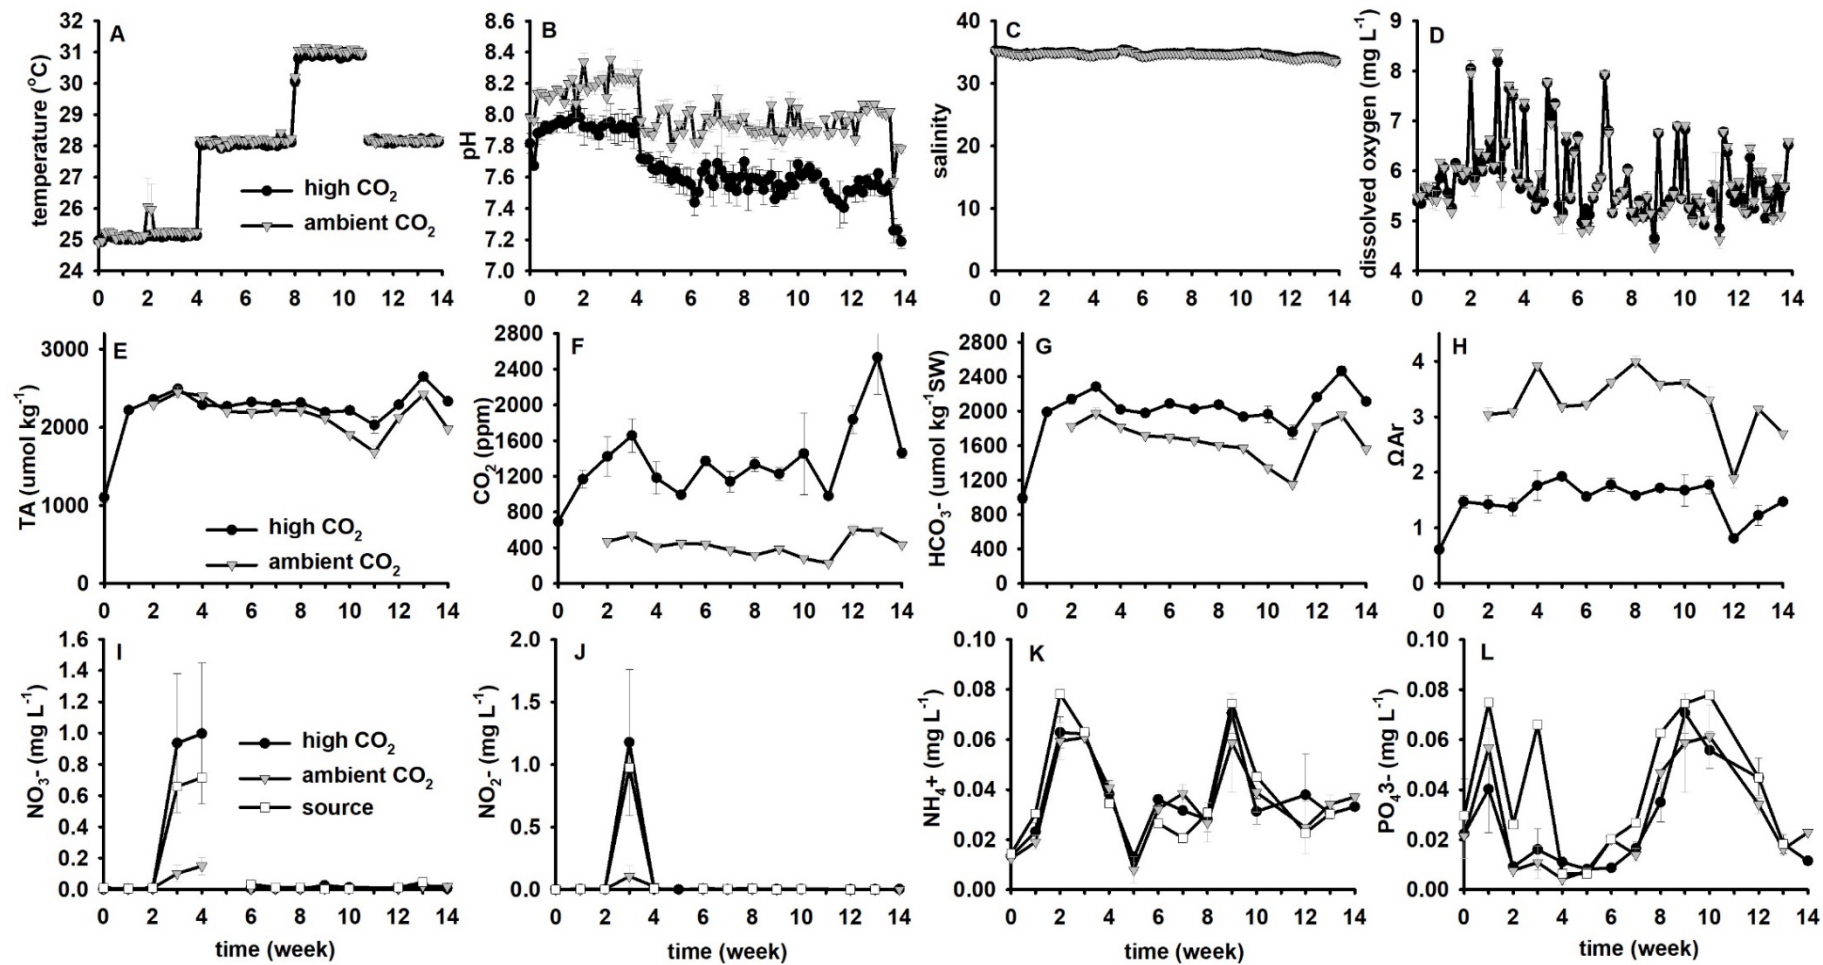

**Figure S4. Abiotic conditions of the ambient (grey) and high- $\text{CO}_2$  (black) mesocosms.** (A) temperature, (B) pH, (C) salinity, (D) dissolved oxygen concentration, (E) total alkalinity (TA), (F)  $\text{CO}_2$  concentration, (G) bicarbonate concentration ( $[\text{HCO}_3^-]$ ), (H) aragonite saturation state ( $\Omega_{\text{Ar}}$ ), (I) nitrate concentration ( $[\text{NO}_3^-]$ ), (J) nitrite concentration ( $[\text{NO}_2^-]$ ), (K) ammonium concentration ( $[\text{NH}_4^+]$ ), and (L) phosphate concentration ( $[\text{PO}_4^{3-}]$ ). Values represent mean $\pm$ SE ( $n=3$ ), and error bars sometimes do not extend beyond the icons (e.g., [G]).
